# Supplementary material
Source: publisher figshare collection journal article supplement (https://karger.figshare.com/articles/dataset/_/4028922)

## Supplemental Figure 1

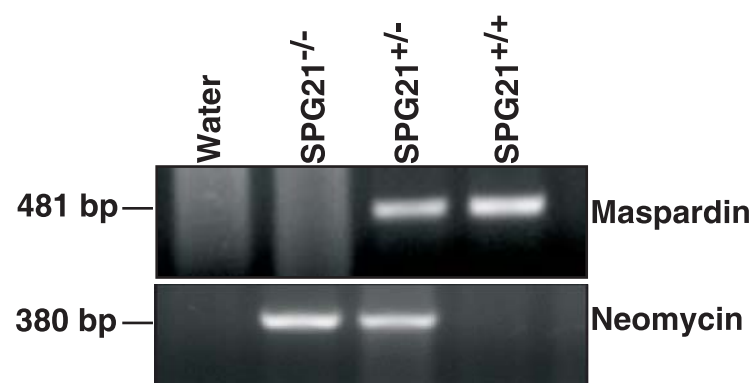

Supplement: Supplementary file 1 [file 1]
